# Supplementary material for: Asymmetries in cloud microphysical properties ascribed to sea ice leads via water vapour transport in the central Arctic
Source: Copernicus journal article supplement (doi:10.5194/acp-23-14521-2023), 2023-11-24
Supplement: Supplementary file 1 [file acp-23-14521-2023-supplement.zip]

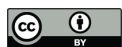

*Supplement of*

## **Asymmetries in cloud microphysical properties ascribed to sea ice leads via water vapour transport in the central Arctic**

**Pablo Saavedra Garfias et al.**

*Correspondence to:* Pablo Saavedra Garfias ([pablo.saavedra@uni-leipzig.de](mailto:pablo.saavedra@uni-leipzig.de))

- [acp-23-14521-2023-supplement-title-page.pdf](#)
- [mosaic\\_Nov-18-2019\\_sea\\_ice\\_back-trajectory\\_IWVT.mp4](#)

The copyright of individual parts of the supplement might differ from the article licence.
